# Supplementary material
Source: MDPI journal article supplement (https://www.mdpi.com/1996-1073/11/3/580)
Supplement: s1 [file s1]

Table S1. Operating data of the thermoelectric heat pump.,,,,,,,,,,,,,,,
,,,,,,,,,,,,,,,
Test,I,NTU_c,NTU_h,"T_c, in",,"T_h, in",,"T_c, out",,"T_h, out",,"T_c, surf",,"T_h, surf",
,,,,Mean,"Standard
deviation",Mean,"Standard
deviation",Mean,"Standard
deviation",Mean,"Standard
deviation",Mean,"Standard
deviation",Mean,"Standard
deviation"
1,1.4,0.51,1.07,16.8,0.05,43.2,0.12,16.3,0.05,43.5,0.07,16.3,0.06,44.9,0.09
2,4.1,0.52,1.11,17.5,0.06,45.7,0.09,14.6,0.05,57.6,0.1,12.8,0.03,58.9,0.12
3,2.5,0.58,1.08,16.8,0.05,45.1,0.04,15.4,0.06,46.3,0.04,14.6,0.01,48.8,0.02
4,4.2,0.58,1.11,17,0.06,46.5,0.12,14.9,0.03,51.3,0.03,13.3,0.02,54.8,0.04
5,4.2,0.59,1.09,17.6,0.05,45.5,0.08,13.9,0.03,49.8,0.1,12.4,0.03,54,0.08
6,2.5,0.51,1.09,16.8,0.06,44.4,0.07,15.5,0.05,48.2,0.12,14.9,0.03,51.5,0.05
7,4.1,0.53,1.11,17.8,0.09,45.3,0.13,15.7,0.05,54.3,0.14,14.2,0.03,58,0.14
8,2.5,0.84,1.08,34.2,0.07,44.1,0.06,30.1,0.05,48.6,0.07,29.8,0.02,52.1,0.06
9,4.1,0.84,1.11,34.6,0.06,45.6,0.06,29.3,0.06,58.7,0.1,28.2,0.01,61.8,0.01
10,2.5,0.86,1.09,34.3,0.26,45.3,0.13,31.4,0.06,46.9,0.12,30.9,0.03,49.9,0.05
11,4.2,0.85,1.09,34.2,0.45,45.5,0.17,30.8,0.09,52.6,0.16,29.7,0.04,55.9,0.11
12,2.5,0.86,1.08,34.4,0.22,44.9,0.11,29.4,0.23,47,0.17,29.1,0.21,49.9,0.14
13,4.2,0.87,1.1,35.3,0.03,46,0.08,29.2,0.05,53.1,0.06,28,0.01,56.2,0.03
14,1,0.85,1.09,34.8,0.17,44.5,0.09,33.4,0.13,44.8,0.09,33.4,0.15,47,0.1
15,4.2,0.86,1.16,35.7,0.1,47.7,0.11,32.4,0.08,60.6,0.2,30.9,0.06,62.8,0.12
16,2.5,0.85,1.47,35.2,0.1,63.3,0.09,32.5,0.08,66.1,0.08,32.1,0.07,70.1,0.08
17,3.8,0.88,1.49,36.7,0.13,64.6,0.16,33,0.12,72.7,0.15,31.7,0.09,76.4,0.08
18,3.9,0.91,1.43,37.4,0.07,65.3,0.08,34.7,0.07,69.4,0.16,33.4,0.04,73.4,0.08
19,3.9,0.87,1.4,35,0.25,63.7,0.08,30.6,0.14,67.2,0.12,29.6,0.07,71.4,0.12
20,2.5,0.87,1.47,36,0.08,63.6,0.1,34.1,0.05,68.5,0.04,33.5,0.05,70.9,0.04
21,3.8,0.9,1.49,37.4,0.04,64.3,0.11,34.8,0.09,74,0.1,33.5,0.02,76.4,0.08
22,2.5,0.51,1.44,16.7,0.05,61.7,0.04,16.6,0.03,64.5,0.11,15.5,0.02,68.4,0.06
23,3.7,0.53,1.47,17.9,0.13,63.4,0.16,17.7,0.12,71.2,0.17,16.2,0.09,73.9,0.14
24,3.8,0.58,1.4,16.5,0.25,63.3,0.18,15.3,0.14,66.2,0.16,14.1,0.04,70.6,0.09
25,3.8,0.59,1.39,17.5,0.05,62.8,0.24,16.8,0.05,66.9,0.22,15.6,0.03,70.3,0.22
26,4.1,0.09,0.2,16,0.06,43.5,0.03,15.5,0.05,47,0.05,12.5,0.02,51.6,0.11
27,2.5,0.11,0.19,16,0.12,42.7,0.2,15.5,0.07,44.6,0.18,13.5,0.05,46.7,0.13
28,4.2,0.11,0.2,16.5,0.27,43.6,0.13,15.8,0.28,46.2,0.17,12.4,0.09,49.9,0.08
29,2.5,0.09,0.2,16.2,0.01,42.9,0.04,16.1,0.01,45.2,0.05,14.6,0.01,47.9,0.09
30,4.1,0.09,0.2,16.6,0.02,42.9,0.08,16.3,0.05,47.1,0.08,13.9,0.01,52.6,0.07
31,2.5,0.11,0.19,16.5,0.05,43.3,0.07,16.4,0.01,45.2,0.05,14.9,0.05,47.4,0.07
32,4.1,0.11,0.2,17.2,0.08,44.1,0.3,16.8,0.11,46.8,0.24,14.1,0.03,50.9,0.07
33,1,0.15,0.2,33.7,0.1,43,0.12,32.8,0.08,44.6,0.12,32.3,0.07,45.9,0.12
34,4.1,0.16,0.2,34.7,0.18,44.9,0.09,32.9,0.1,49.6,0.08,29.6,0.04,56,0.08
35,1,0.16,0.19,33.9,0.27,43.2,0.39,32.8,0.1,44.7,0.14,32.4,0.08,45.7,0.1
36,4.2,0.16,0.2,35.3,0.22,44.6,0.15,33.7,0.13,47.3,0.15,30.4,0.05,51.5,0.07
37,1,0.16,0.2,35,0.05,43.2,0.04,34.3,0.02,44.7,0.05,33.9,0.05,46,0.05
38,4.1,0.16,0.21,35.3,0.06,45.4,0.08,34.2,0.06,50.4,0.08,31.6,0.03,56.4,0.05
39,1,0.16,0.2,34.9,0.15,43.6,0.1,34.2,0.12,44.8,0.1,33.8,0.13,45.8,0.05
40,4.2,0.16,0.2,35.1,0.09,44.6,0.06,33.9,0.1,47.2,0.07,31.1,0.07,51.1,0.06
41,2.5,0.16,0.26,34.3,0.19,61,0.34,33.5,0.15,64,0.18,32.2,0.05,66.9,0.14
42,3.7,0.16,0.26,35.2,0.05,59.6,0.36,34,0.06,64.9,0.31,32,0.05,70.3,0.27
43,2.5,0.16,0.25,33.6,0.14,61.6,0.26,32.8,0.12,64.4,0.12,31.3,0.12,66.8,0.1
44,3.8,0.16,0.25,35.1,0.11,61.7,0.18,34.1,0.13,65,0.16,31.6,0.12,68.8,0.13
45,2.5,0.16,0.27,35.5,0.07,61.9,0.29,35,0.06,65,0.26,33.8,0.04,68,0.13
46,3.7,0.16,0.27,35.4,0.04,63.1,0.23,34.8,0.03,68,0.23,32.7,0.01,72.9,0.21
47,2.5,0.16,0.25,35.1,0.13,60.8,0.28,34.5,0.08,63.4,0.16,33.3,0.08,66.2,0.27
48,3.8,0.16,0.25,35.8,0.08,61.5,0.22,35,0.08,64.7,0.15,32.9,0.05,68.8,0.25
49,3.8,0.1,0.27,17.2,0.05,61.8,0.36,17,0.05,66,0.38,14.7,0.08,70.5,0.4
50,3.7,0.11,0.25,17.6,0.08,61.6,0.06,17.5,0.04,64.8,0.05,14.8,0.05,68.7,0.08
51,3.7,0.11,0.26,18.6,0.12,62.4,0.09,18.5,0.11,65.6,0.05,16.3,0.01,69.5,0.12
52,1.8,0.37,0.63,25.5,0.17,52.4,0.16,25.2,0.16,53.8,0.14,24.1,0.16,55.7,0.15
53,2.5,0.37,0.64,25.5,0.17,52.9,0.28,24.6,0.21,56.6,0.32,21.3,0.8,60.2,0.28
54,4,0.37,0.64,25.3,0.25,53.6,0.07,24.2,0.36,59.6,0.09,21.9,0.47,65.1,0.06
55,2.5,0.37,0.62,25,0.47,53.6,0.68,24.2,0.32,56.2,0.49,22.2,0.14,59.6,0.48
56,2.5,0.38,0.64,25.2,0.45,53.5,0.43,24.8,0.44,57.3,0.44,23.1,0.44,60.9,0.42
57,2.5,0.7,1.22,24.7,0.09,52.4,0.04,22.4,0.03,57.6,0.04,21.7,0.02,62.1,0.02
